# Supplementary material for: Cross-Informant Agreement on Child and Adolescent Withdrawn Behavior: A Latent Class Approach
Source: Springer Nature journal article supplement (doi:10.1007/s10578-012-0330-1), 2012-09-11
Supplement: MOESM1 [file 528984]

**Supplemental Table:** Fit Statistics for LCA Models

| **Parent Report** |  |  |  |
| --- | --- | --- | --- |
| **NonReferred only** | -2LL | BIC | bootstrap p |
| 1-Cluster (with age,sex) | -6291.7783 | 12643.3093 | <0.001 |
| 2-Cluster (with age,sex) | -5718.9971 | 11579.9069 | 0.008 |
| 3-Cluster (with age,sex) | -5663.6026 | 11551.2778 | 0.008 |
| 4-Cluster (with age,sex) | -5620.7073 | 11547.647 | 0.058 |
| 5-Cluster (with age,sex) | -5595.4858 | 11579.3639 | 0.076 |
| 4-Cluster (age only) | -5625.9464 | 11535.718 | 0.072 |
| 4-Cluster (sex only) | -5675.0766 | 11633.9783 | 0.338 |
| **4-Cluster (age, sad->underactive)** | **-5618.7109** | **11528.7161** | **0.05** |
| 4-Cluster (age, sad->underactive->enjoys little) | -5614.6253 | 11528.0139 | 0.094 |
| **Teacher Report** |  |  |  |
| **NonReferred only** | -2LL | BIC | bootstrap p |
| 1-Cluster (with age,sex) | -3211.4231 | 6482.5988 | <0.001 |
| 2-Cluster (with age,sex) | -2624.9118 | 5391.7362 | 0.016 |
| 3-Cluster (with age,sex) | -2577.4303 | 5378.9332 | 0.27 |
| 4-Cluster (with age,sex) | -2552.2703 | 5410.7731 | 0.254 |
| 5-Cluster (with age,sex) | -2538.5486 | 5465.4896 | 0.248 |
| 3-Cluster (age only) | -2577.9908 | 5365.1159 | 0.132 |
| 3-Cluster (sex only) | -2578.6872 | 5366.5088 | 0 |
| 3-Cluster (neither age nor sex) | -2579.1774 | 5352.5509 | 0 |
| **3-Cluster (age only, enjoyslittle->shy)** | **-2572.0876** | **5360.7787** | **0.144** |
| **Self Report** |  |  |  |
| **NonReferred only** | -2LL | BIC | bootstrap p |
| 1-Cluster (with age,sex) | -4958.3599 | 9976.4724 | <0.001 |
| 2-Cluster (with age,sex) | -4572.5125 | 9286.9376 | 0.01 |
| 3-Cluster (with age,sex) | -4544.6768 | 9313.4261 | 0.034 |
| 4-Cluster (with age,sex) | -4521.9859 | 9350.2043 | 0.022 |
| 5-Cluster (with age,sex) | -4503.3116 | 9395.0156 | 0.026 |
| 3-Cluster (age only) | -4550.2392 | 9309.6127 | 0.022 |
| 3-Cluster (sex only) | -4552.4056 | 9313.9455 | 0.034 |
| **3-Cluster (age only, won't talk->shy)** | **-4540.5234** | **9297.6502** | **0.018** |

**Supplemental Table notes on model fitting:**

For the parent report, we first fit 1-5 classes with age and sex as covariates. The 4 class solution had the lowest BIC, was 0.05 or greater on bootstrapping and had the fewest significant bivariate residuals. Dropping sex as a covariate did not worsen the BIC, but dropping age did. We then added in a direct effect between sad 🡪 underactive and the BIC improved while the model remained 0.05 or greater on bootstrapping. Adding another direct effect with enjoys little made little change in the BIC, so a 4-class solution with age only and with a direct effect sad 🡪 underactive was accepted as the best model (indicated in **bold**).

For the teacher report, we first fit 1-5 classes with age and sex as covariates. The 3 class solution had the lowest BIC, was 0.05 or greater on bootstrapping and had the fewest significant bivariate residuals. Dropping sex as a covariate did not worsen the BIC. Dropping age as a covariate also improved the BIC, but the models were <0.001 by bootstrapping, so age was retained. Adding in a direct effect between enjoys little 🡪 shy led to a lower BIC than age only and was still greater than 0.05 by bootstrapping. There were no further significant bivariate residuals, so a 3-class model with age only and with a direct effect between enjoys litte 🡪 shy was accepted as the best model (indicated in **bold**).

For the self report, we first fit 1-5 classes with age and sex as covariates. There was no model that was 0.05 or greater on bootstrapping. While the 2-class solution had the lower BIC, the 3-class solution had only one significant bivariate residual. Thus, we decided to choose the 3-class solution as the best model. Dropping sex as a covariate did not worsen the BIC. Dropping age as a covariate made little difference in the BIC, but did make a difference when the one significant bivariate residual, won’t talk 🡪 shy, was included as a direct effect. With no particularly outstanding model, a 3-class model with age only and with a direct effect between won’t talk 🡪 shy was accepted as the best model (indicated in **bold**).
